# Supplementary material for: Towards Scalable Large-Area Pulsed Laser Deposition
Source: MDPI journal article supplement (doi:10.3390/ma14174854), 2021-08-26
Supplement: s1 [file s1]

# Towards Scalable Large-Area Pulsed Laser Deposition

Zakhar Vakulov <sup>1,\*</sup>, Daniil Khakhulin <sup>2,†</sup>, Evgeny Zamburg <sup>3</sup>, Alexander Mikhaylichenko <sup>4</sup>, Vladimir A. Smirnov <sup>5</sup>, Roman Tominov <sup>5</sup>, Viktor S. Klimin <sup>5</sup> and Oleg A. Ageev <sup>5,6</sup>

<sup>1</sup> Federal Research Centre The Southern Scientific Centre of the Russian Academy of Sciences (SSC RAS), 41 Chekhov St., 344006 Rostov-on-Don, Russia

<sup>2</sup> Research Laboratory of Functional Nanomaterials Technology, Southern Federal University, 2 Shevchenko St., 347922 Taganrog, Russia; dhakhulin@sfsu.ru

<sup>3</sup> Department of Electrical & Computer Engineering, National University of Singapore, 4 Engineering Drive 3, Singapore 117583, Singapore; zamburg@nus.edu.sg

<sup>4</sup> FORS Development Center, 3, Trifonovskiy Tupik, 129272 Moscow, Russia; alexandrVM@bk.ru

<sup>5</sup> Institute of Nanotechnologies, Electronics and Equipment Engineering, Southern Federal University, 2 Shevchenko St., 347922 Taganrog, Russia; vasmirnov@sfsu.ru (V.A.S.), tominov@sfsu.ru (R.T.), kliminvs@sfsu.ru (V.S.K.); ageev@sfsu.ru (O.A.A.)

<sup>6</sup> Research and Education Centre 'Nanotechnologies', Southern Federal University, 2 Shevchenko St., 347922 Taganrog, Russia

\* Correspondence: vakulov@ssc-ras.ru

† These authors contributed equally to this work.

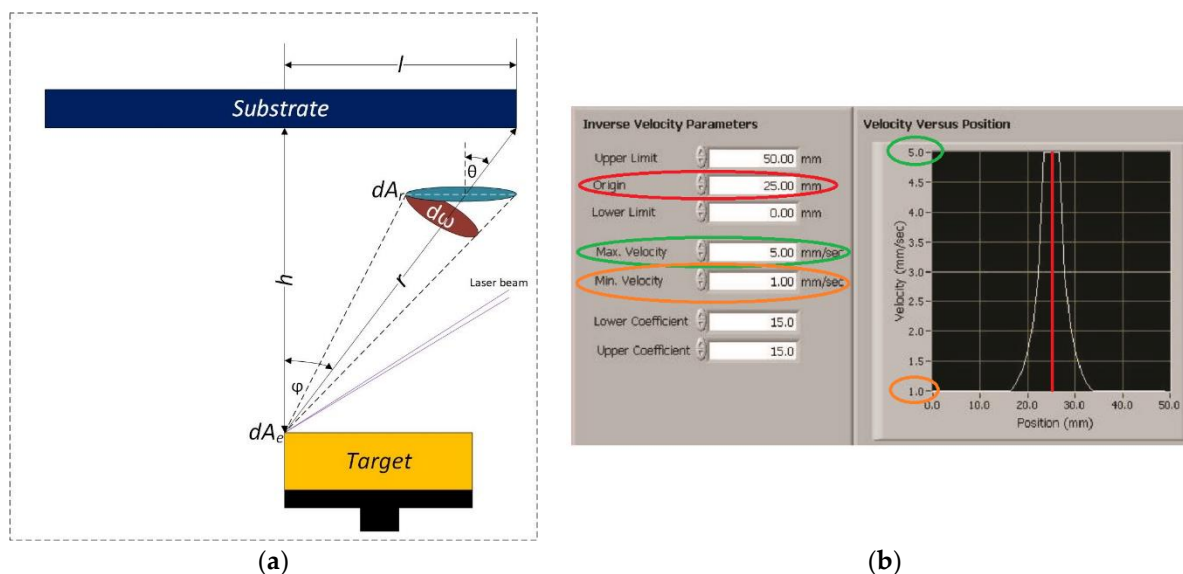

**Figure S1.** Target material evaporation from a cell  $dA_e$  by a laser beam on substrate surface element  $dA_r$  (a) and Pioneer 180 PLD software (b).

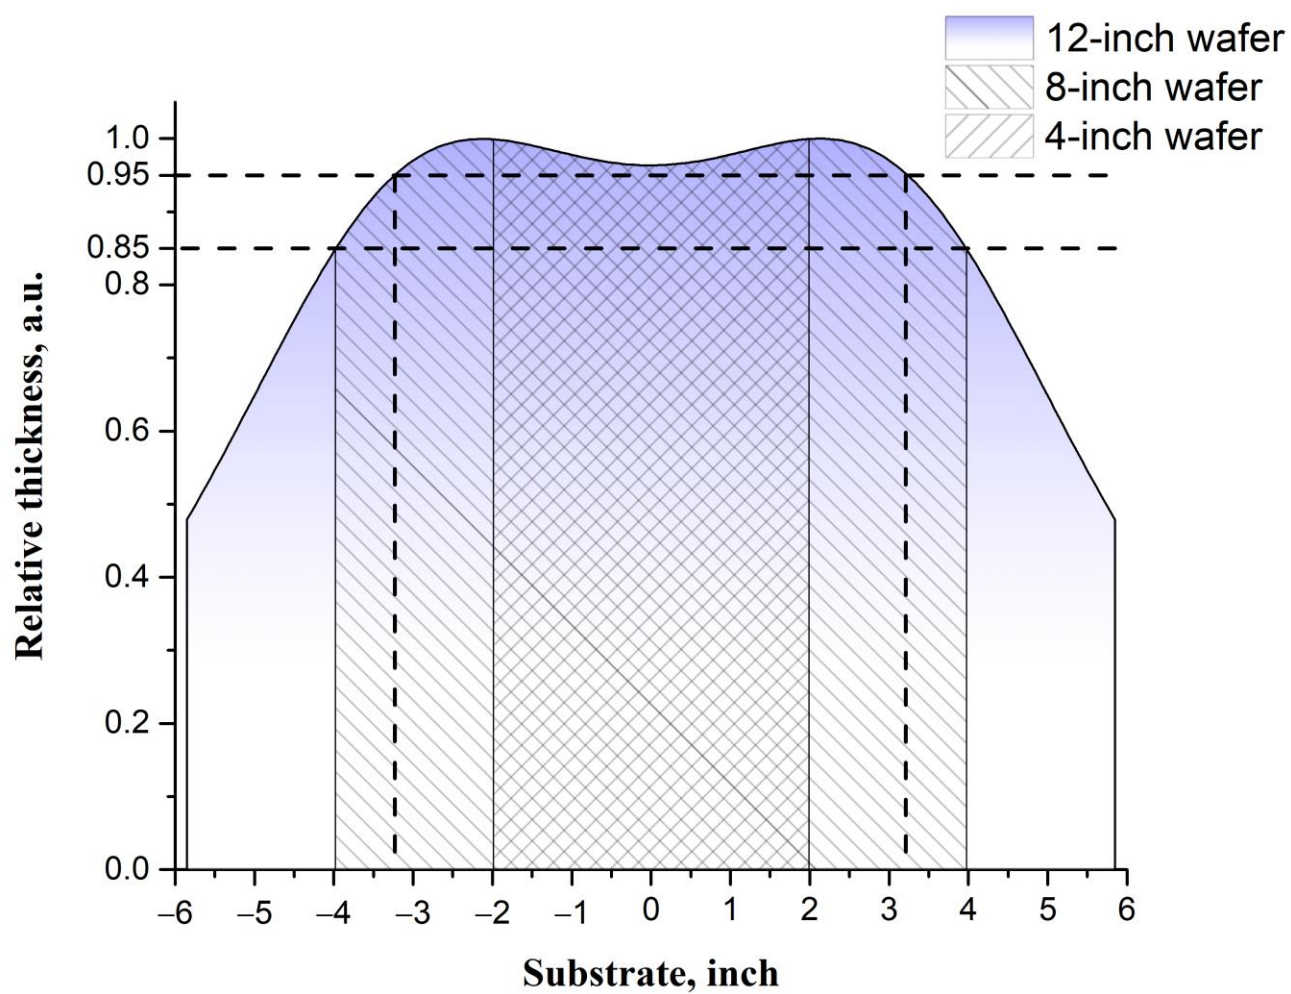

**Figure S2.** Example of practical use of the obtained dependencies.
